# Supplementary material for: Prevalence And Phylogenetic Analysis of Babesia Parasites In Host Animals In Fujian Province, Southeast China
Source: Research Square preprint supplement (doi:10.21203/rs.3.rs-793814/v1), 2021-08-27
Supplement: Supplementary file 1 [file 438fe1e6d6d56ec6804c8f0b.docx]

**Supplementary information**

**Results**

**The prevalence of *B. microti* in rodents captured from different surveillance sites in Fujian Province**

Infected rodents were captured from 14 surveillance sites, including Gutian, Xiapu, Yong’an, Youxi, Datian, Changle, Pucheng, Shaowu, Shunchang, Jianyang, Minhou, Songxi, Fu’an, and Luoyuan (Table S1). Rodents collected from Gutian had the highest *B. microti* infection rate of 19.51% (8/41). However, when Luoyuan was compared to that of the control group, rodents from Gutian, Xiapu, Yong’an, and Youxi had significantly higher *B. microti* infection rates (odd ratios: 19.39, 15.00, 13.33, and 12.97, respectively; all *P* values < 0.05) (Table S1).

**Table S1. The prevalence of *B. microti* in rodents captured from different surveillance sites**

| **Surveillance sites** | **No. of rodents**  **tested** | **No. of positive**  **for *B. microti*** | **Positive rate (%)** | **Odd ratio** |
| --- | --- | --- | --- | --- |
| Gutian | 41 | 8 | 19.51 | 19.39 |
| Xiapu | 38 | 6 | 15.79 | 15.00 |
| Yong’an | 21 | 3 | 14.29 | 13.33 |
| Youxi | 86 | 12 | 13.95 | 12.97 |
| Datian | 25 | 2 | 8.00 | 6.96 |
| Changle | 17 | 1 | 5.88 | 5.00 |

(Continued)

**Table S1. Continued**

| **Surveillance sites** | **No. of rodents**  **tested** | **No. of positive**  **for *B. microti*** | **Positive rate (%)** | **Odd ratio** |
| --- | --- | --- | --- | --- |
| Pucheng | 48 | 2 | 4.17 | 3.48 |
| Shaowu | 53 | 2 | 3.77 | 3.14 |
| Shunchang | 68 | 2 | 2.94 | 2.42 |
| Jianyang | 37 | 1 | 2.70 | 2.22 |
| Minhou | 40 | 1 | 2.50 | 2.05 |
| Songxi | 46 | 1 | 2.17 | 1.78 |
| Fu’an | 50 | 1 | 2.00 | 1.63 |
| Luoyuan | 81 | 1 | 1.23 | 1.00 |
| Anxi | 16 | 0 | 0.00 |  |
| Dehua | 16 | 0 | 0.00 |  |
| Dongshan | 41 | 0 | 0.00 |  |
| Fuqing | 27 | 0 | 0.00 |  |
| Pingnan | 35 | 0 | 0.00 |  |

(Continued)

**Table S1. Continued**

| **Surveillance sites** | **No. of rodents**  **tested** | **No. of positive**  **for *B. microti*** | **Positive rate (%)** | **Odd ratio** |
| --- | --- | --- | --- | --- |
| Qingliu | 39 | 0 | 0.00 |  |
| Shishi | 78 | 0 | 0.00 |  |
| Xianyou | 30 | 0 | 0.00 |  |
| Xinluo | 31 | 0 | 0.00 |  |
| Yanping | 48 | 0 | 0.00 |  |
| Zhenghe | 30 | 0 | 0.00 |  |
| Zhouning | 45 | 0 | 0.00 |  |
| Total | 1087 | 43 | 3.96 |  |
